# Supplementary material for: Constructing inverse opal structured hematite photoanodes via electrochemical process and their application to photoelectrochemical water splitting
Source: Royal Society of Chemistry journal article supplement (doi:10.1039/c3cp50459j), 2013-01-01
Supplement: c3cp50459j.pdf [file c3cp50459j.pdf]

## Supporting Information

### **Constructing inverse opal structured hematite photoanodes via electrochemical process and their application to photoelectrochemical water splitting**

*Xinjian Shi*<sup>†</sup>, *Kan Zhang*<sup>†</sup>, *Kahee Shin*<sup>†</sup>, *Jun Hyuk Moon*<sup>‡</sup>, *Tae-Woo Lee*<sup>§</sup>, *Jong Hyeok Park*<sup>†</sup>

<sup>†</sup>School of Chemical Engineering, Sungkyunkwan University, Suwon 440-746, Republic of Korea  
lutts@skku.edu

<sup>‡</sup>Department of Chemical and Biomolecular Engineering, Sogang University, 1 Shinsu-dong, Mapo-gu, Seoul 121-742, Korea

<sup>§</sup>Department of Materials Science and Engineering, Pohang University of Science and Technology, San 31, Hyoja-dong, Nam-gu, Pohang, Gyeongbuk 790-784, Korea

Email Address: lutts@skku.edu

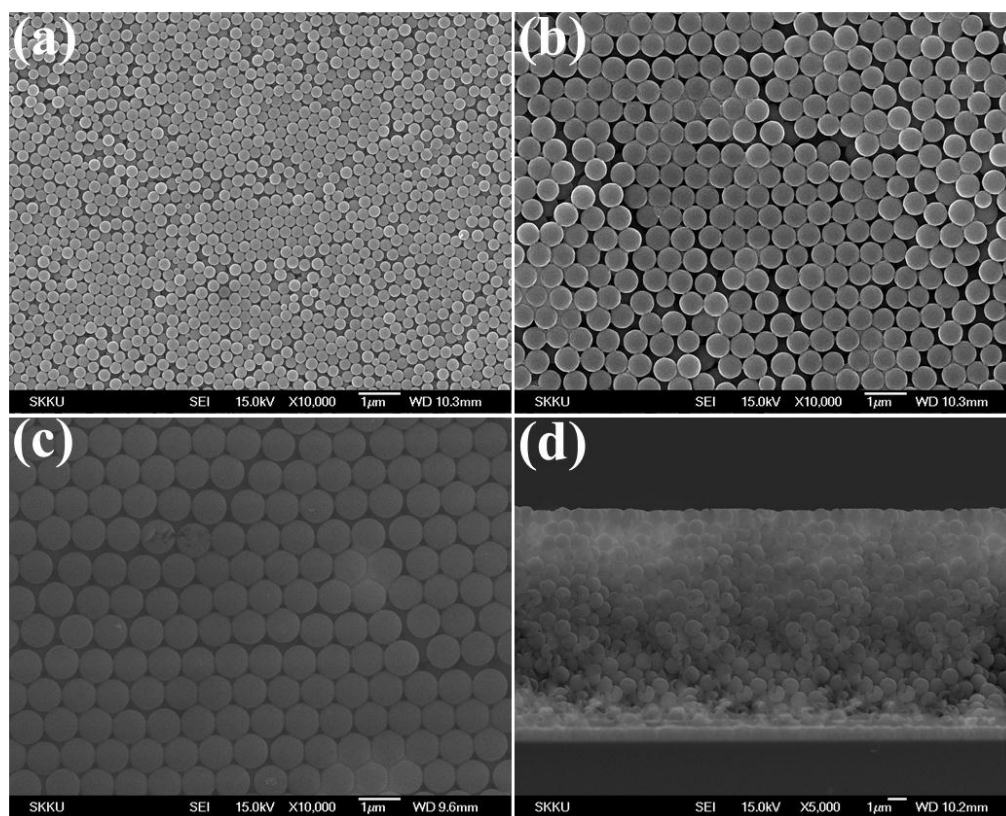

**Figure S1.** FE-SEM image of different sized PS colloid templates: (a) 250 nm, (b) 500 nm and (c) 900 nm; (d) the section image for a general PS template.

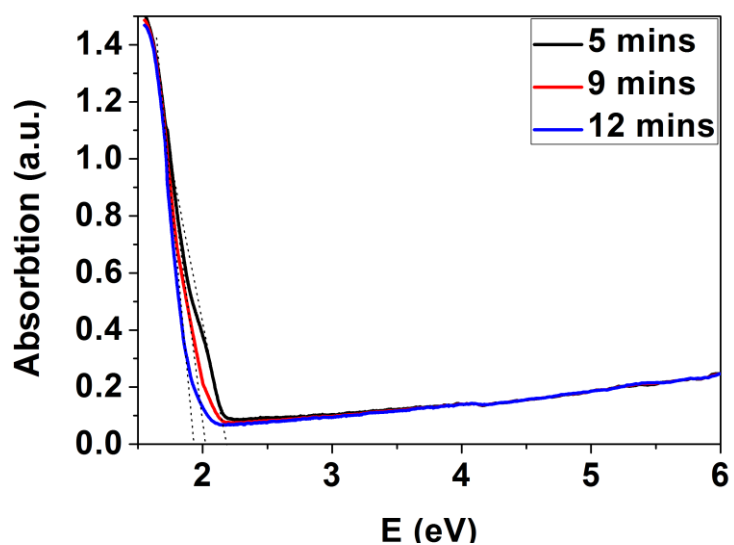

**Figure S2.** The optical band gap ( $E_g$ ) of the IOS  $\alpha$ -Fe<sub>2</sub>O<sub>3</sub> electrodes made by 250nm beads under 400 °C annealing with different electrodeposition time.

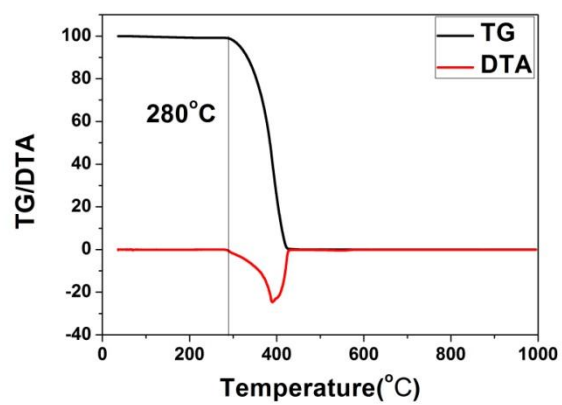

**Figure S3.** TGA data of PS beads as template.

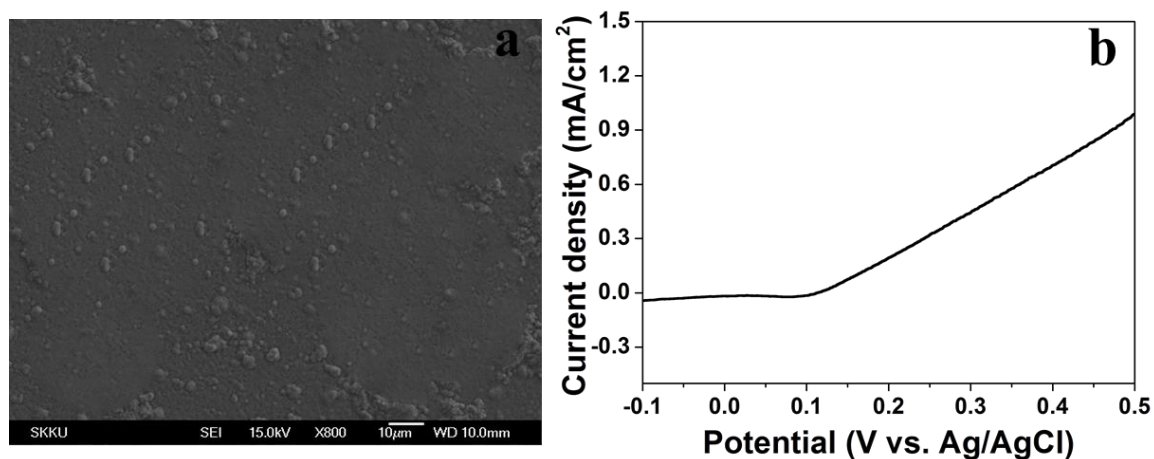

**Figure S4** (a) the morphology of a general planar  $\alpha\text{-Fe}_2\text{O}_3$ , (b) the I-V curve of the planar  $\alpha\text{-Fe}_2\text{O}_3$  vs. potential in 1M NaOH electrolyte under AM 1.5G light.
